# Supplementary material for: Mt10-CVB3 Vaccine Virus Protects against CVB4 Infection by Inducing Cross-Reactive, Antigen-Specific Immune Responses
Source: Microorganisms. 2021 Nov 10;9(11):2323. doi: 10.3390/microorganisms9112323 (PMC8622534; doi:10.3390/microorganisms9112323)
Supplement: Supplementary file 1 [file microorganisms-09-02323-s001.zip › microorganisms-1433348-supplementary.pdf]

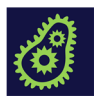

## Supplementary Material

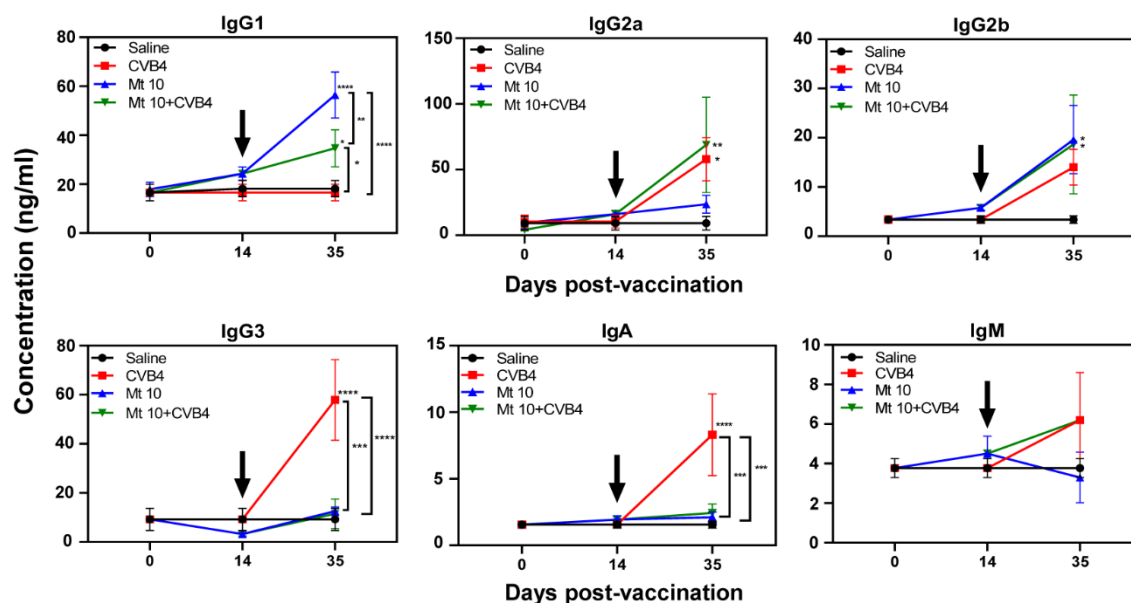

**Figure S1.** Detection of serum Ig isotypes. Sera collected on various days from indicated groups were analyzed to quantify Ig isotypes using LEGENDplex bead array as described in the methods section. Mean  $\pm$  SEM values obtained from three individual experiments, each involving  $n = 3$  to 6 mice are indicated. Black downward arrow indicates time-point of CVB4 challenge. Two-way ANOVA and Mann-Whitney test were used to determine significance between groups. \* $p \leq 0.05$ , \*\* $p \leq 0.01$ , \*\*\* $p \leq 0.001$  and \*\*\*\* $p \leq 0.0001$ .

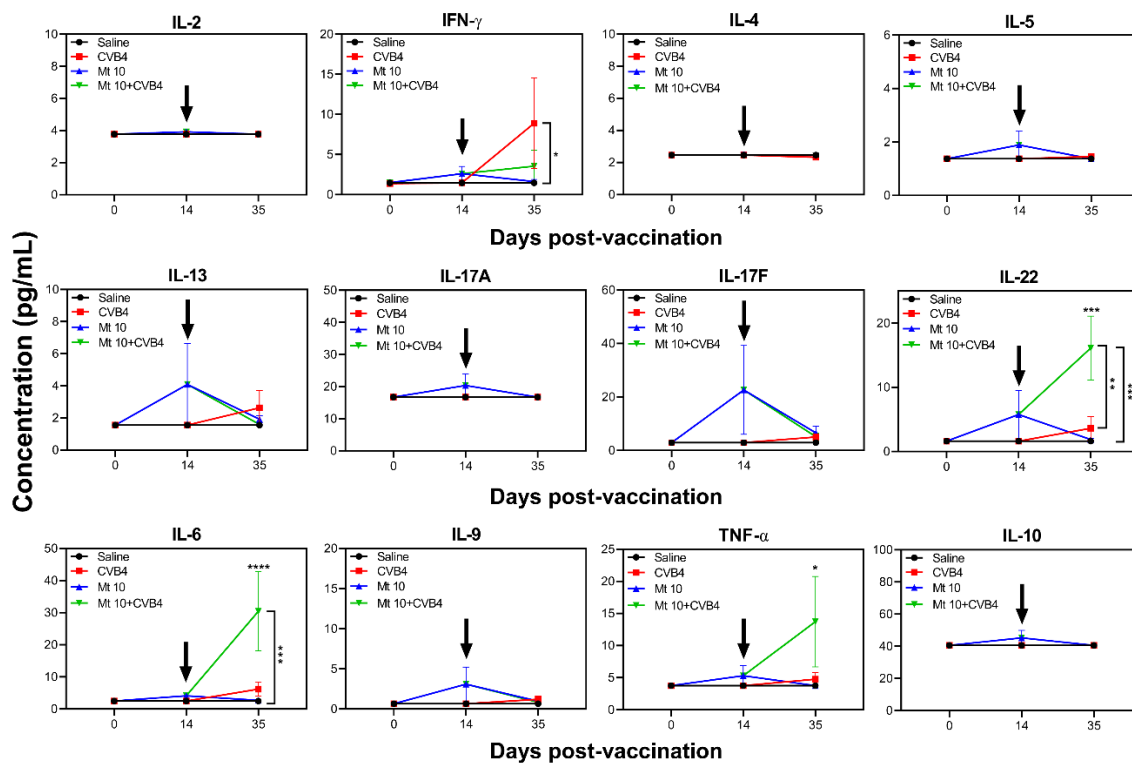

**Figure S2.** Serum cytokine analysis of vaccinated mice. Sera collected on days 0, 14, 35 post-vaccination from the indicated groups were analysed for cytokines using LEGENDplex cytokine bead array as described in the methods section. Mean  $\pm$  SEM values obtained from three individual experiments, each involving  $n = 3$  to 6 mice are indicated. Black downward arrow indicates time-point of CVB4 challenge. Two-way ANOVA was used to determine significance between various treatment groups. \* $p \leq 0.05$ , \*\* $p \leq 0.01$ , \*\*\* $p \leq 0.001$  and \*\*\*\* $p \leq 0.0001$ .
